# Supplementary material
Source: HighWire-hosted journal article supplement (https://www.rcpjournals.org/highwire/filestream/9356/field_highwire_adjunct_files/0/Carpenter_Supplemental_file_1.pdf)
Supplement: Carpenter_Supplemental_file_1.pdf [file Carpenter_Supplemental_file_1.pdf]

DATE:  
Total number of doctors (F1, SHO) on this ward surveyed:

HOSP:  
WARD:

## Afternoon ward rounds – a regional evaluation of medical wards

Individual form for each doctor (from FY1 up to SHO) surveyed please.

Total no. of doctors on ward including you (F1,SHO only): \_\_\_\_\_  
(So we can calculate what % surveyed)

**Please only include consultant ward rounds and those you would consider to be the 'main' rounds (ie. As opposed to a registrar or consultant reviewing selected patients)**

How frequently are you involved in ward rounds which **start** after 1 PM? (As opposed to morning ward rounds which have late finishes?) (Please circle)

Daily    3-5 times / week    1-2 / week    3-4/ month    1-2 / month    <1/month    Never

If you do undertake afternoon ward rounds, how often do these contribute to a late finish (after 5PM or your contracted hours) for any member of the team?

Daily    3-5 times / week    1-2 / week    3-4/ month    1-2 / month    <1/month    Never

If you do undertake afternoon ward rounds, to what extent do you agree with the following statements:

*“Afternoon ward rounds contribute to delayed discharge of patients.”*

Strongly disagree    Disagree    Don't know    Agree    Strongly agree

*“Afternoon ward rounds contribute to reduced communication with relatives.”*

Strongly disagree    Disagree    Don't know    Agree    Strongly agree

*“The junior doctors on this ward could work more efficiently if ward rounds all began promptly at the start of the day.”*

Strongly disagree    Disagree    Don't know    Agree    Strongly agree

*“Afternoon ward rounds detrimentally affect our sense of satisfaction / fulfilment with the job.”*

Strongly disagree    Disagree    Don't know    Agree    Strongly agree

*“The prospect of a lifetime of afternoon ward rounds makes hospital medicine seem less appealing as a career choice.”*

Strongly disagree    Disagree    Don't know    Agree    Strongly agree

Any other comments:

**Many thanks for allowing us to anonymously collect this information as part of a service evaluation. Any comments please contact [carpenter.alexander@gmail.com](mailto:carpenter.alexander@gmail.com)**
